# Supplementary material
Source: PubMed Central journal article supplement (PMC1740593)
Supplement: oenvmed_60_8_612__1.pdf [file oenvmed_60_8_612__1.pdf]

## Web-only References

1. **Leikauf G.G.**, Simpson, L.G., Santrock, J., Zhao, Q., Abbinante-Nissen, J., Zhou, S., Driscoll, K.E. Airway epithelial cell responses to ozone injury. *Environ. Health Perspect.* 1995; **103** (Suppl. 2), 1-5.
2. **Pryor W.A.**, Can vitamin E protect humans against the pathological effects of ozone in smog. *Am.J. Clin. Nutr.* 1991; **53**:702-722.
3. **Madden MC**, Thomas MJ, Ghio AJ. Acetaldehyde production in rodent lung after exposure to metal rich particles. *Free Radic Biol Med* 1999; **26**: 1569-77.
4. **Dreher K**, Jaskot R, Kodavanti U, Lehmann J, Winsett D, Costa D. Soluble transition metals mediate the acute pulmonary injury and airway hyperreactivity induced by residual oil fly ash particles. *Chest* 1996; **109**(suppl 3):33s–34s.
5. **Prahalad AK**, Soukup JM, Inmon J, Willis R, Ghio AJ, Becker S, Gallagher JE. Ambient air particles: effects on cellular oxidant radical generation in relation to particulate elemental chemistry. *Toxicol Appl Pharmacol* 1999; **158**(2):81-91.
6. **Ackermann-Lieblich U**, Leuenberger P, Schwartz J, et al. Lung function and long term exposure to air pollutants in Switzerland. Study on Air Pollution and Lung Diseases in Adults (SAPALDIA) Team. *Am J Respir Crit Care Med* 1997; **155**: 122–29.
7. **Zemp E**, Elsasser S, Schindler C, et al. Long-term ambient air pollution and respiratory symptoms in adults (SAPALDIA study). *Am J Respir Crit Care Med* 1999; **159**: 1257–66.
8. **Braun-Fahrlander C**, Vuille JC, Sennhauser FH, et al. Respiratory health and long-term exposure to air pollutants in Swiss schoolchildren. *Am J Respir Crit Care Med* 1997; **155**: 1042–49.
9. **Dockery DW**, Cunningham J, Damokosh AI, et al. Health effects of acid aerosols on North American children: respiratory symptoms. *Environ Health Perspect* 1996; **104**: 500–05.

10. **Raizenne M**, Neas LM, Damokosh AI, et al. Health effects of acid aerosols on North American children: pulmonary function. *Environ Health Perspect* 1996; **104**: 506–14.
11. **Spengler JD**, Koutrakis P, Dockery DW, Raizenne M, Speizer FE. Health effects of acid aerosols on North American children: air pollution exposures. *Environ Health Perspect* 1996; **104**: 492–99.
12. **Gauderman WJ**, McConnell R, Gilliland F, et al. Association between air pollution and lung function growth in southern California children. *Am J Respir Crit Care Med* 2000; **162**: 1383–90.
13. **Avol EL**, Gauderman WJ, Tan SM, London SJ, Peters JM. Respiratory effects of relocating to areas of differing air pollution levels. *Am J Respir Crit Care Med* 2001; **164**: 2067–72.
14. **Aust AE**, Ball JC, Hu AA, Lighty JS, Smith KR, Straccia AM, Veranth JM, Young WC. Particle characteristics responsible for effects on human lung epithelial cells. *Res Rep Health Eff Inst* 2002 (110):1-65
15. **Gilmour PS**, Rahman I, Donaldson K, MacNee W. Histone acetylation regulates epithelial IL-8 release mediated by oxidative stress from environmental particles. *Am J Physiol Lung Cell Mol Physiol* 2003 284(3):L533-L540
16. **Sorensen M**, Daneshvar B, Hansen M, Dragsted LO, Hertel O, Knudsen L, Loft S. Personal PM(2.5 )Exposure and Markers of Oxidative Stress in Blood. *Environ Health Perspect* 2003 111(2):161-6
17. **Dick CA**, Brown DM, Donaldson K, Stone V. The role of free radicals in the toxic and inflammatory effects of four different ultrafine particle types. *Inhal Toxicol* 2003 Jan;15(1):39-52
18. **Li N**, Wang M, Oberley TD, Sempf JM, Nel AE. Comparison of the pro-oxidative and proinflammatory effects of organic diesel exhaust particle chemicals in bronchial epithelial cells and macrophages. *J Immunol* 2002;169(8):4531-41
19. **Gurgueira SA**, Lawrence J, Coull B, Murthy GG, Gonzalez-Flecha B. Rapid increases in the steady-state concentration of reactive oxygen species in the lungs and heart after particulate air pollution inhalation. *Environ Health Perspect* 2002 110(8):749-55

20. **Cassee FR**, Boere AJ, Bos J, Fokkens PH, Dormans JA, van Loveren H. Effects of diesel exhaust enriched concentrated PM<sub>2.5</sub> in ozone preexposed or monocrotaline-treated rats. *Inhal Toxicol* 2002 14(7):721-43
21. **Li N**, Kim S, Wang M, Froines J, Sioutas C, Nel A. Use of a stratified oxidative stress model to study the biological effects of ambient concentrated and diesel exhaust particulate matter. *Inhal Toxicol* 2002 14(5):459-86
